# Supplementary material for: Lightweight, superelastic, and temperature-resistant rGO/polysulfoneamide-based nanofiber composite aerogel for wearable piezoresistive sensors
Source: Royal Society of Chemistry journal article supplement (doi:10.1039/d3tc02496b), 2023-01-01
Supplement: d3tc02496b1.pdf [file d3tc02496b1.pdf]

# **Lightweight, Superelastic, and Temperature-Resistant rGO/Polysulfoneamide-Based Nanofiber Composite Aerogel for Wearable Piezoresistive Sensor**

*Ziwen Wang,<sup>a</sup> Zhen Qin,<sup>a</sup> Biao Zhao,<sup>a</sup> Han Zhu<sup>\*b</sup> and Kai Pan<sup>\*a</sup>*

<sup>a</sup> State Key Laboratory of Organic-Inorganic Composites, Beijing Key Laboratory of Advanced Functional Polymer Composites, College of Materials Science and Engineering, Beijing University of Chemical Technology, Beijing 100029, China.

\* E-mail: [pankai@mail.buct.edu.cn](mailto:pankai@mail.buct.edu.cn)

<sup>b</sup> College of Materials Science and Engineering, Beijing University of Chemical Technology, Beijing, China

\* E-mail: [zhuhan@mail.buct.edu.cn](mailto:zhuhan@mail.buct.edu.cn)

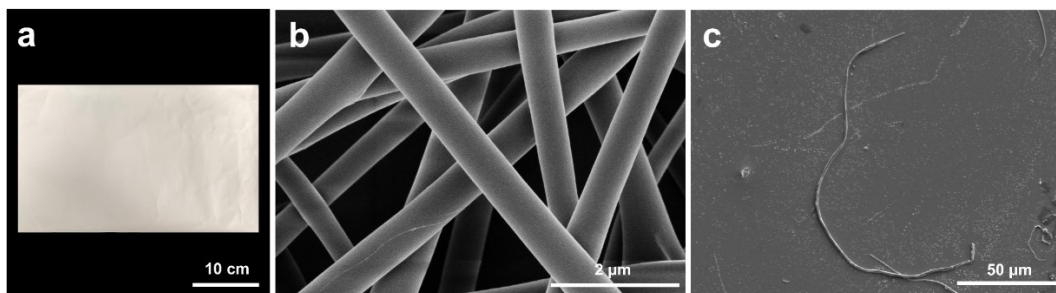

**Fig. S1** (a) The picture of PSAN nanofiber film, (b) the SEM image of PSAN nanofiber film, (c) the SEM image of homogenized PSAN nanofiber.

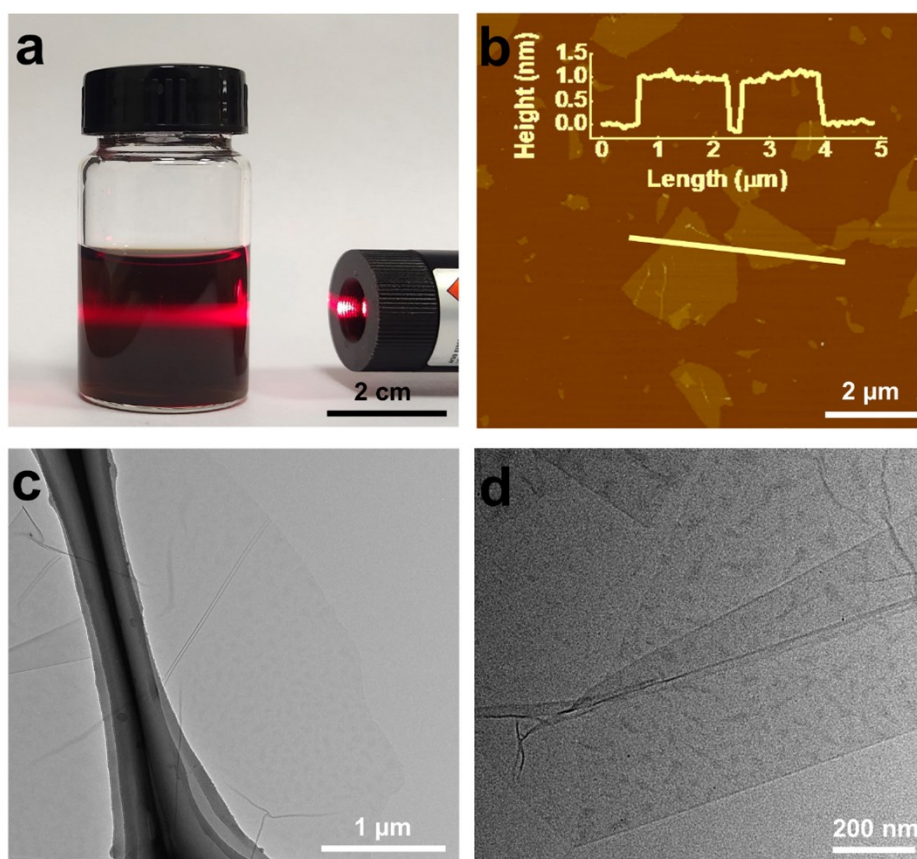

**Fig. S2** (a) The digital picture of GO dispersion, (b) the AFM image of GO nanosheets, (c,d) the TEM images of GO nanosheets.

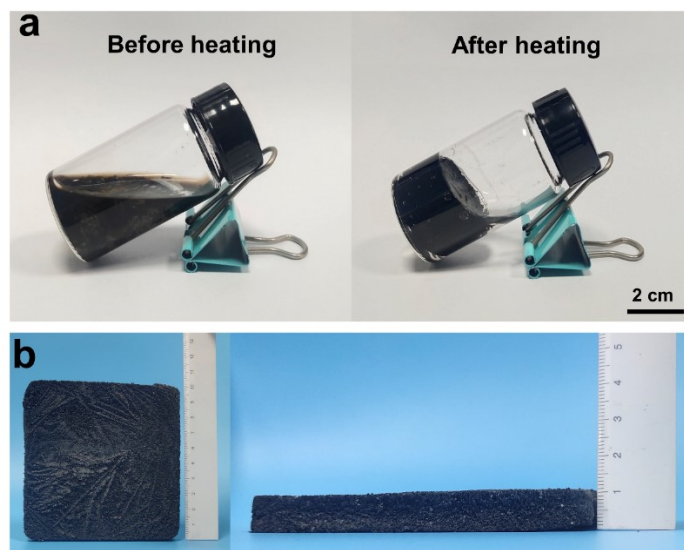

**Fig. S3** (a) The mixed solution of GO dispersion and PSAN nanofibers formed hydrogel after heating, (b) GA can be fabricated into large size.

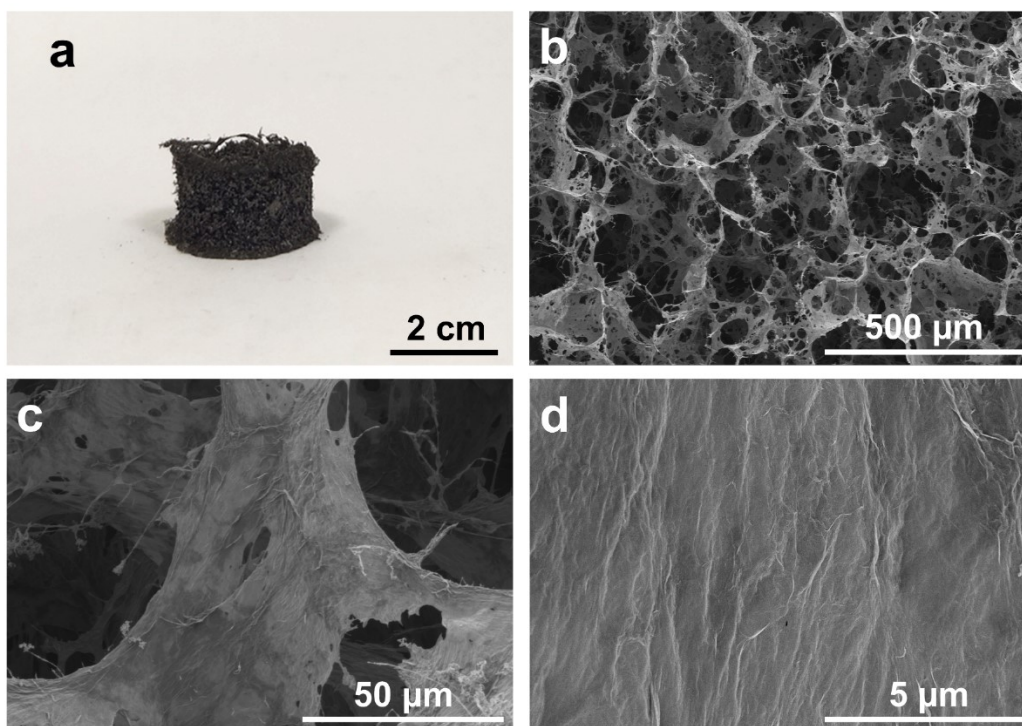

**Fig. S4** (a) Digital picture of the prepared rGO aerogel, SEM images inside rGO aerogel with (b) interconnected porous structure and (c,d) smooth pore wall structure.

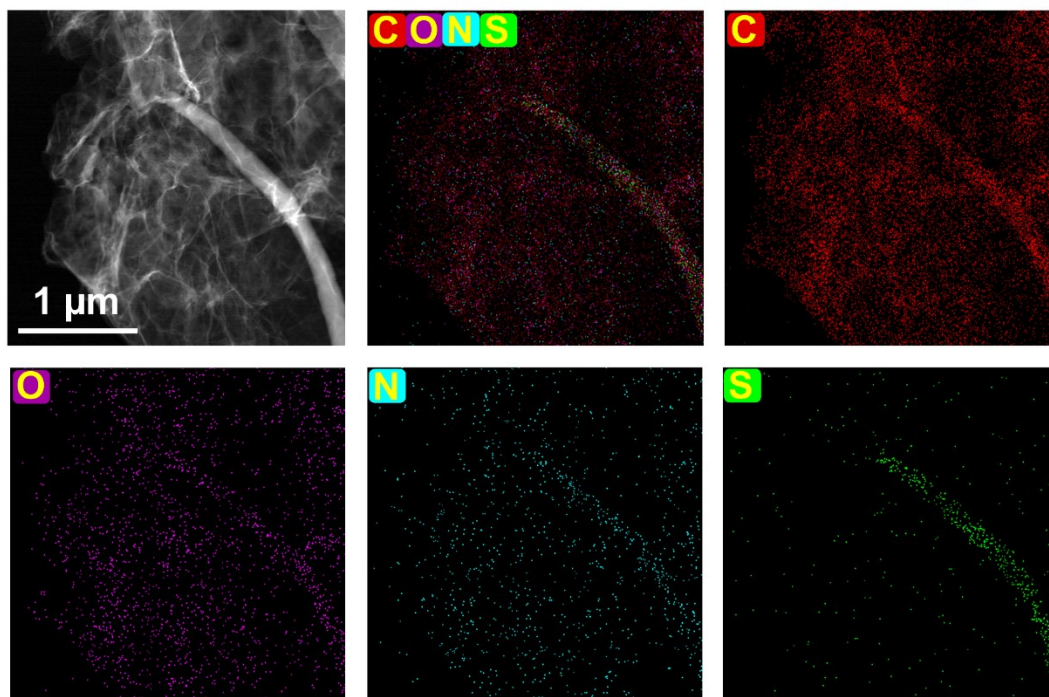

**Fig. S5** Elements distribution on the pore wall of GA-1.

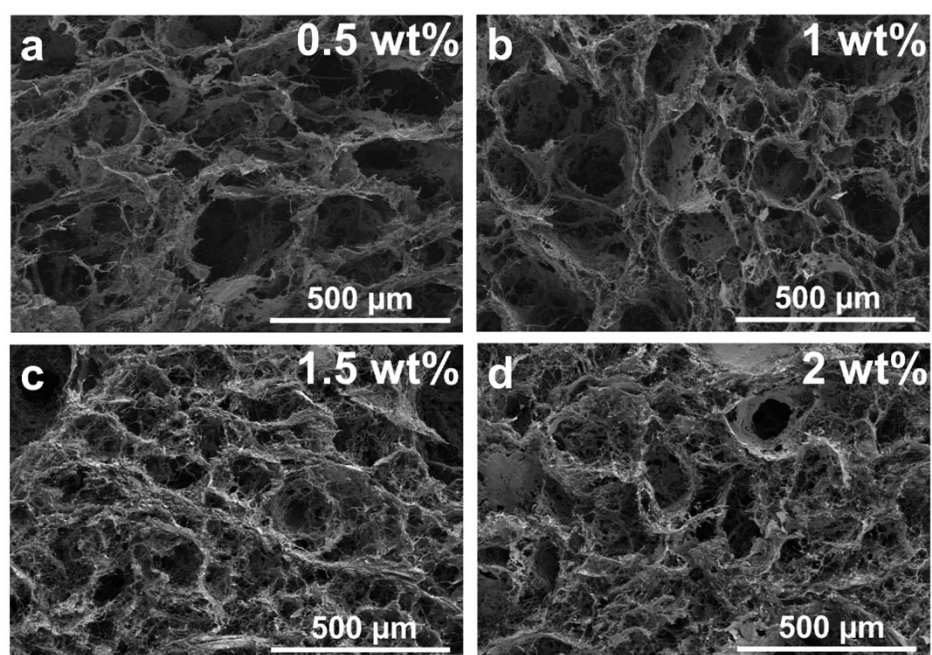

**Fig. S6** Pore structures of GA with PSAN nanofiber contents of (a) 0.5 wt%, (b) 1 wt%, (c) 1.5 wt%, and (d) 2 wt%, respectively.

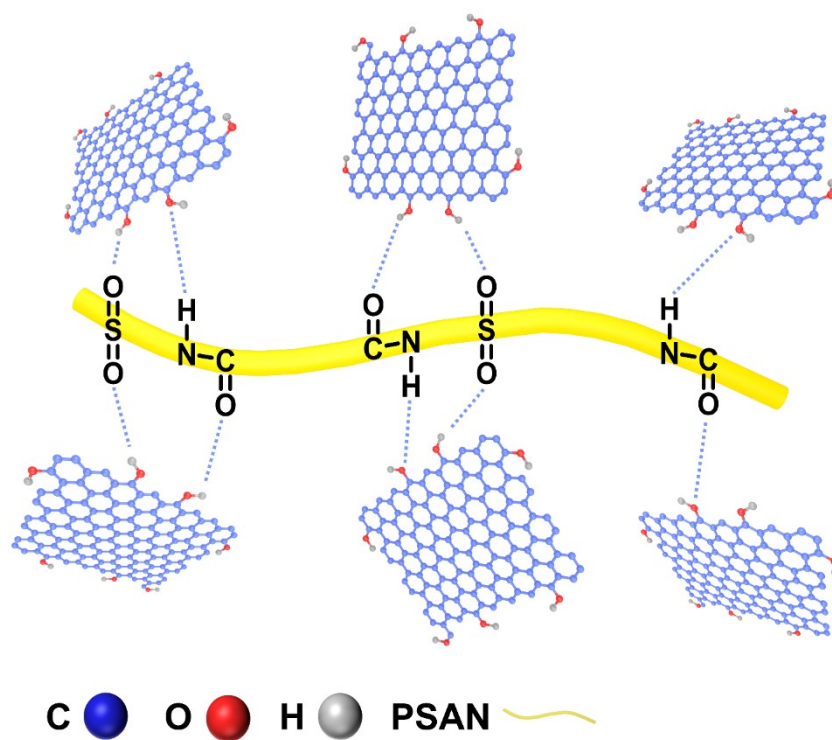

**Fig. S7** Schematic illustration of hydrogen bonds formation between rGO nanosheets and PSAN nanofibers.

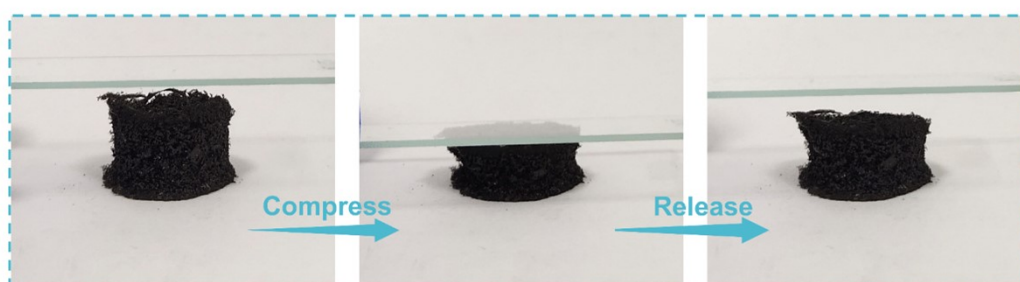

**Fig. S8** Compression and recovery process of rGO aerogel.

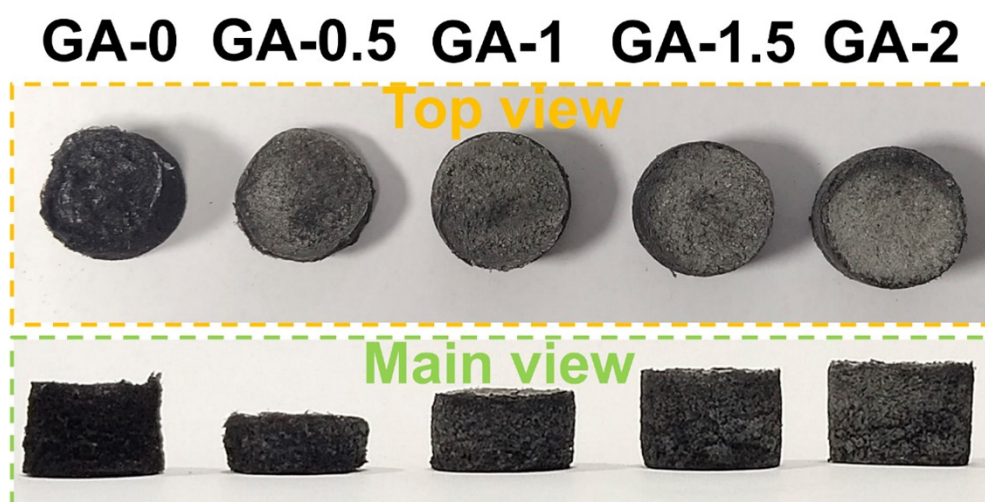

**Fig. S9** Top and main views of rGO aerogel and GA with different PSAN nanofiber contents.

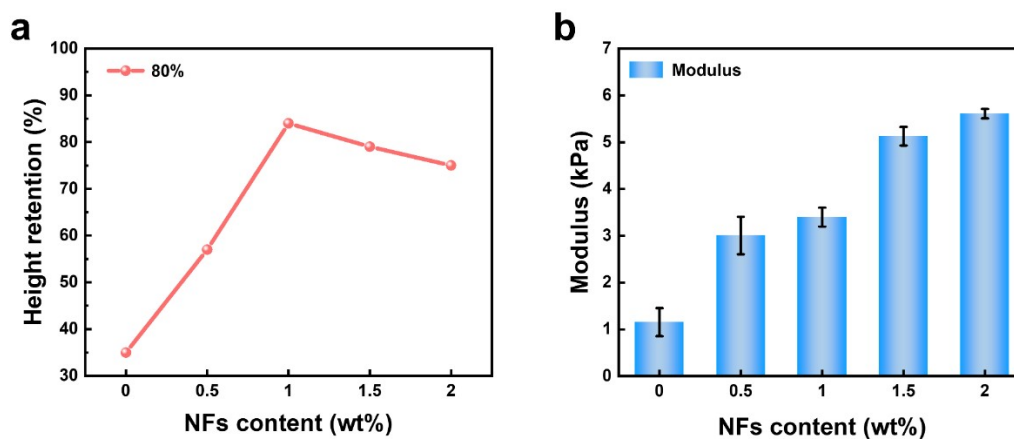

**Fig. S10** (a) The height retention of GA with different PSAN nanofiber contents under 80% strain, (b) the compression modulus of GA with different PSAN nanofiber contents.

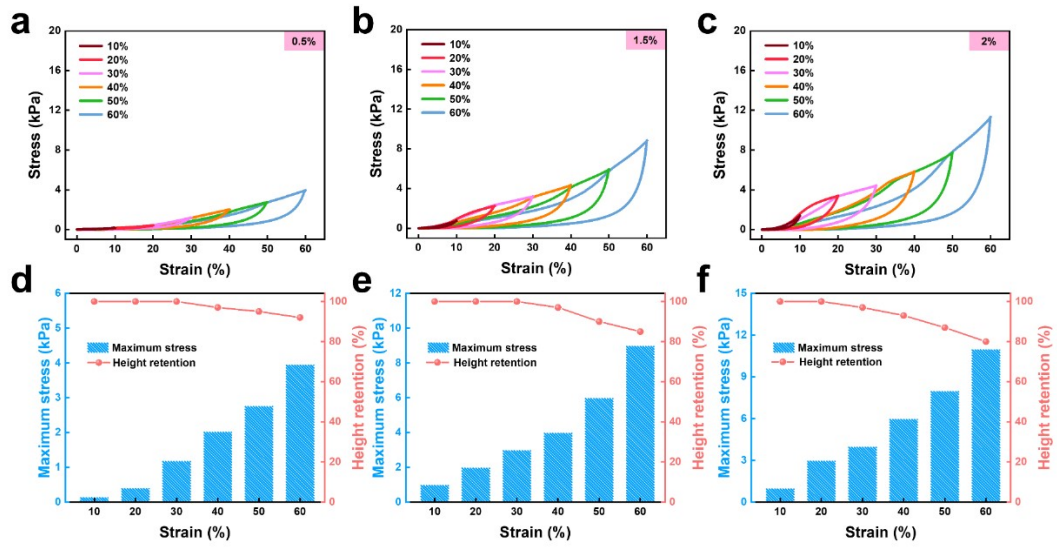

**Fig. S11** (a-c) Stress-strain curves and (d-f) height retention and maximum strength of GA with PSAN nanofiber content of 0.5 wt%, 1.5 wt% and 2 wt% under 10-60% strain, respectively.

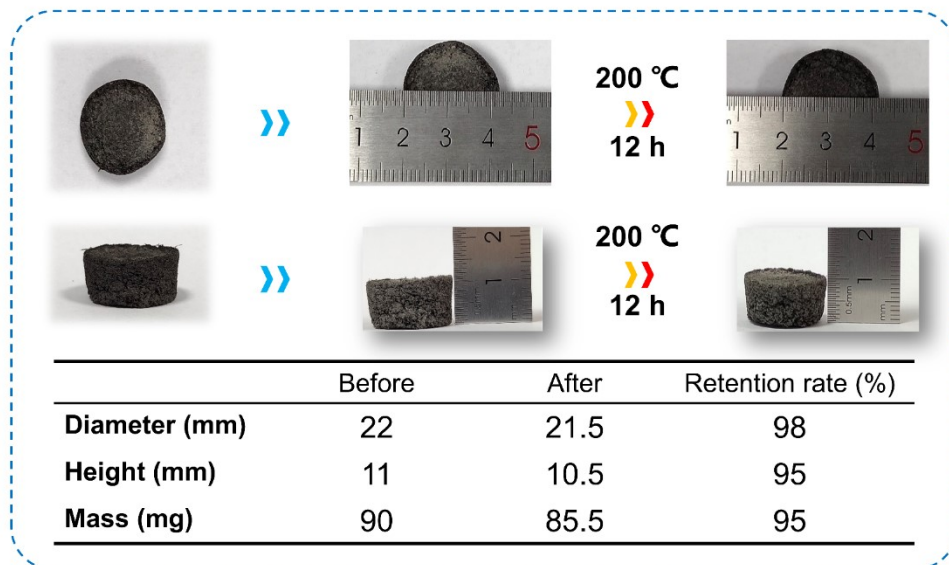

**Fig. S12** Changes in shape, size and mass of GA-1 after being heated at 200 °C for 12

h.

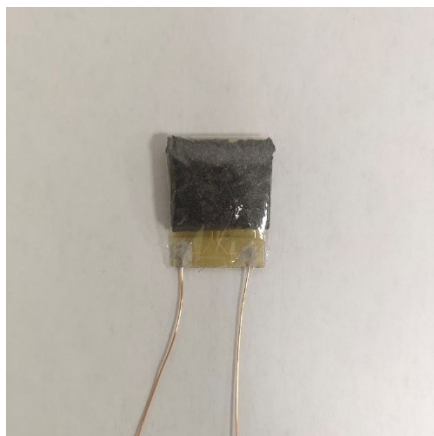

**Fig. S13** Picture of the GA-based flexible piezoresistive sensor.

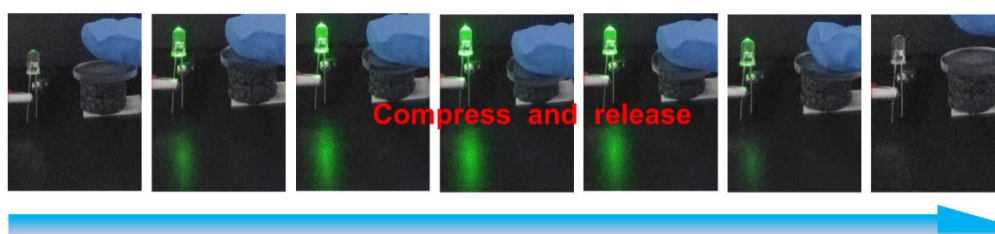

**Fig. S14** The brightness of LED varies with GA-1 during compression and recovery process.

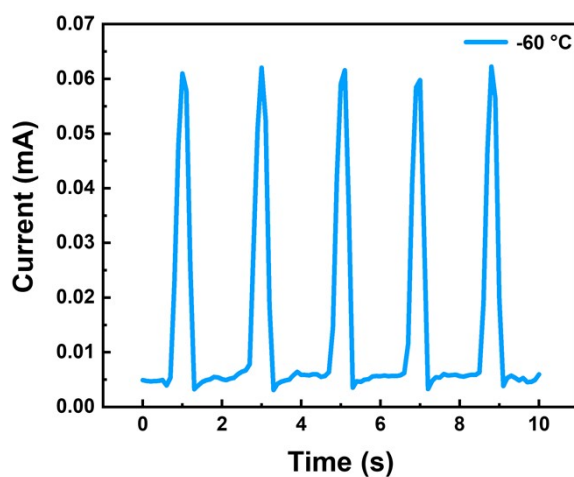

**Fig. S15** The piezoresistive sensing performance of GA-1-based piezoresistive sensor at -60 °C.



**Table S1** Performance comparison of flexible pressure sensors based on rGO aerogel.

| Materials         | Pressure range                          | Sensitivity                                                            | Compression strength | Durability | Response time       | Recovery time       | Reference |
|-------------------|-----------------------------------------|------------------------------------------------------------------------|----------------------|------------|---------------------|---------------------|-----------|
| rGO/ANF/PANI<br>T | ~0.7 kPa<br>0.7~7 kPa                   | 1.73 kPa <sup>-1</sup><br>0.3 kPa <sup>-1</sup>                        | 3 kPa (45%)          | 3000       | 240 ms<br>(10%)     | 140 ms<br>(10%)     | [1]       |
| CNF/CNT/rGO       | ~0.21 kPa                               | 5.61 kPa <sup>-1</sup>                                                 | 1.2 kPa<br>(80%)     | 2000       | -                   | -                   | [2]       |
| BC/rGO            | ~2.54 kPa<br>2.54~12 kPa                | 13.89 kPa <sup>-1</sup><br>2.71 kPa <sup>-1</sup>                      | 52 kPa (80%)         | 1000       | 120 ms              | 540 ms              | [3]       |
| CNT/rGO           | ~0.5 kPa<br>0.5~3.5 kPa                 | 7 kPa <sup>-1</sup><br>11.8 kPa <sup>-1</sup>                          | 11.5 kPa<br>(60%)    | 2000       | 317 ms              | 303 ms              | [4]       |
| PAN/rGO           | ~14 kPa                                 | 28.62 kPa <sup>-1</sup>                                                | 43.54 kPa<br>(80%)   | 2600       | 305 ms<br>(2634 Pa) | 165 ms<br>(2634 Pa) | [5]       |
| MXene/rGO         | ~3.3 kPa<br>3.3~6.4 kPa<br>6.4~10.1 kPa | 61 kPa <sup>-1</sup><br>334 kPa <sup>-1</sup><br>609 kPa <sup>-1</sup> | 11.5 kPa<br>(80%)    | 17000      | 232 ms              | 225 ms              | [6]       |
| rGO               | ~3.9 kPa<br>3.9~13.56 kPa               | 9.13 kPa <sup>-1</sup><br>7.29 kPa <sup>-1</sup>                       | 6 kPa (80 %)         | 10000      | 0.35 s<br>(1.43kPa) | 0.39 s<br>(1.43kPa) | [7]       |
| PI/rGO            | ~0.52 kPa<br>20~59 kPa                  | 1.33 kPa <sup>-1</sup><br>0.002 kPa <sup>-1</sup>                      | 60 kPa<br>(80%)      | 1000       | 60 ms<br>(0.5%)     | 70 ms<br>(0.5%)     | [8]       |
| PPy/rGO           | ~1 kPa<br>1~9 kPa                       | 0.9 kPa <sup>-1</sup><br>0.0122 kPa <sup>-1</sup>                      | -                    | 10000      | 165 ms              | 132 ms              | [9]       |
| MXene/rGO         | ~0.2 kPa<br>0.2~2 kPa                   | 6.22 kPa <sup>-1</sup><br>2.53 kPa <sup>-1</sup>                       | 4.5 kPa (90%)        | 1250       | 8 ms                | 50 ms               | [10]      |
| GA-1              | ~24.97 kPa                              | 32.85 kPa <sup>-1</sup>                                                | 26.07 kPa<br>(80%)   | 3500       | 300 ms<br>(20%)     | 200 ms<br>(20%)     | This Work |

## Reference:

1. Y. B. Zou, Z. Y. Chen, X. Guo, Z. Y. Peng, C. Y. Yu and W. B. Zhong, *ACS Appl. Mater. Interfaces*, 2022, **14**, 17858-17868.
2. H. Y. Liu, T. Xu, C. Y. Cai, K. Liu, W. Liu, M. Zhang, H. S. Du, C. L. Si and K. Zhang, *Adv. Funct. Mater.*, 2022, **32**, 2113082.
3. S. Wei, X. Y. Qiu, J. Q. An, Z. M. Chen and X. X. Zhang, *Compos. Sci. Technol.*, 2021, **207**, 108730.
4. H. Zhu, S. P. Dai, X. S. Zhou, X. Dong, Y. Y. Jiang, Y. W. Chen, N. Y. Yuan and J. N. Ding, *J. Compos. Mater.*, 2021, **55**, 3661-3669.
5. X. Y. Cao, J. Zhang, S. W. Chen, R. J. Varley and K. Pan, *Adv. Funct. Mater.*, 2020, **30**, 2003618.
6. M. Zhu, Y. Yue, Y. F. Cheng, Y. Zhang, J. Su, F. Long, X. L. Jiang, Y. Ma and Y. H. Gao, *Adv. Electron. Mater.*, 2019, **6**, 1901064.
7. J. K. Huang, J. B. Zeng, B. Q. Liang, J. W. Wu, T. G. Li, Q. Li, F. Feng, Q. W. Feng, M. J. Rood and Z. F. Yan, *ACS Appl. Mater. Interfaces*, 2020, **12**, 16822-16830.
8. Q. Xu, X. H. Chang, Z. D. Zhu, L. Xu, X. C. Chen, L. B. Luo, X. Y. Liu and J. Q. Qin, *RSC Adv.*, 2021, **11**, 11760-11770.
9. H. Wei, A. Li, D. Kong, Z. Li, D. Cui, T. Li, B. Dong and Z. Guo, *Adv. Compos. Hybrid Mater.*, 2021, **4**, 86-95.
10. L. Liu, J. Zhang, G. Shi, H. Zhang, B. Wang and L. Zhong, *J. Mater. Sci.*, 2022, **57**, 11202-11214.
